# Supplementary material for: An Examination of Subjective and Objective Measures of Stress in Tactical Populations: A Scoping Review
Source: MDPI journal article supplement (doi:10.3390/healthcare11182515), 2023-09-11
Supplement: s1 [file s1]

Supplemental Table S2: General trends of measures and volume of evidence

|               |                                 | Overall trend | n of studies | References                                           |
|---------------|---------------------------------|---------------|--------------|------------------------------------------------------|
| Physiological | HR                              | ↑             | 24           | 1, 5-7, 9-11, 14, 15, 17-19, 25-29, 31, 33-35, 38-42 |
|               | HRV - RMSSD                     | ↑             | 9            | 7, 14, 18, 19, 27, 29, 33, 35, 39                    |
|               | HRV - HF                        | ↑↓            | 7            | 19, 27, 29, 31, 33, 35, 39                           |
|               | HRV - LF                        | ↑↓            | 7            | 19, 27, 29, 31, 33, 35, 39                           |
|               | Body Temp                       | ↑             | 14           | 2, 7, 9-11, 15, 25, 27, 28, 31, 33, 34, 40, 42       |
|               | SpO <sub>2</sub>                | ↑↓            | 9            | 2, 5, 9, 27-29, 33, 34, 39                           |
| Saliva        | Cortisol                        | ↑             | 9            | 1, 3, 5, 12, 13, 17, 24, 26, 32                      |
|               | Alpha Amylase                   | ↑             | 1            | 24                                                   |
|               | CRP                             | ↔             | 2            | 12, 13                                               |
|               | NPY                             | ↑             | 1            | 17                                                   |
|               | DHEA                            | ↑             | 2            | 17, 32                                               |
|               | Testosterone                    | ↑             | 1            | 17                                                   |
| Blood         | [La <sup>-</sup> ] <sub>b</sub> | ↑             | 11           | 2, 5, 6, 19, 27-29, 33-35, 38                        |
|               | CK                              | ↑             | 3            | 4, 5, 23                                             |
|               | Cortisol                        | ↑             | 8            | 16, 17, 21, 22, 30, 36-38                            |
|               | Testosterone                    | ↓             | 6            | 21, 22, 30, 36-38                                    |
|               | IGF-1                           | ↓             | 4            | 21-23, 37                                            |
|               | SHBG                            | ↑             | 4            | 8, 22, 36, 37                                        |
|               | DHEA                            | ↑             | 3            | 16, 17, 38                                           |
|               | IL-6                            | ↑             | 2            | 4, 38                                                |
|               | CRP                             | ↑             | 1            | 8                                                    |
|               | NPY                             | ↔             | 1            | 30, 38                                               |
|               | sTfR                            | ↑             | 1            | 17                                                   |
|               | Hepcidin                        | ↑             | 1            | 20                                                   |
|               | TNF-α                           | ↓             | 1            | 23                                                   |
|               | BDNF                            | ↔             | 1            | 16                                                   |
|               | Epinephrine                     | ↑             | 2            | 17, 30                                               |
|               | Norepinephrine                  | ↑             | 2            | 17, 30                                               |
|               | Dopamine                        | ↑             | 1            | 30                                                   |
|               | TSH                             | ↔             | 1            | 8                                                    |
|               | Leptin                          | ↓             | 1            | 23                                                   |
|               | T3                              | ↓             | 1            | 8                                                    |
|               | T4                              | ↓             | 1            | 8                                                    |
|               | Glucose                         | ↑             | 4            | 5, 7, 28, 29                                         |
| Psychological | RPE                             | ↑             | 14           | 2, 6, 7, 9, 15, 18, 19, 25, 27, 28, 33, 35, 39, 41   |

|                                                          |    |    |                          |
|----------------------------------------------------------|----|----|--------------------------|
| STAI                                                     | ↑  | 10 | 2, 9, 24-29, 33, 35      |
| CSAI-2R                                                  | ↑↓ | 7  | 2, 5, 27, 28, 29, 33, 35 |
| POMS                                                     | ↑↓ | 4  | 4, 17, 24, 38            |
| SSP                                                      | ↑  | 3  | 2, 9, 39                 |
| DASS                                                     | ↑  | 1  | 4                        |
| ERIQ                                                     | ↔  | 2  | 12, 13                   |
| Perceptions of<br>thermal and<br>respiratory<br>distress | ↑  | 1  | 25                       |
| IES-R                                                    | ↑  | 1  | 32                       |

1. Backe, E.M., et al., *Assessment of salivary cortisol as stress marker in ambulance service personnel: comparison between shifts working on mobile intensive care unit and patient transport ambulance*. Int Arch Occup Environ Health, 2009. **82**(9): p. 1057-64.
2. Bustamante-Sanchez, A. and V.J. Clemente-Suarez, *Psychophysiological response in night and instrument helicopter flights*. Ergonomics, 2020. **63**(4): p. 399-406.
3. Charles, L.E., et al., *Shiftwork and Diurnal Salivary Cortisol Patterns Among Police Officers*. J Occup Environ Med, 2016. **58**(6): p. 542-9.
4. Chester, A.L., et al., *Physiological, biochemical, and psychological responses to environmental survival training in the Royal Australian Air Force*. Mil Med, 2013. **178**(7): p. e829-35.
5. Clemente-Suarez, V.J., et al., *Experience modulates the psychophysiological response of airborne warfighters during a tactical combat parachute jump*. Int J Psychophysiol, 2016. **110**: p. 212-216.
6. Clemente-Suarez, V.J., P.R. Palomera, and J.J. Robles-Perez, *Psychophysiological response to acute-high-stress combat situations in professional soldiers*. Stress Health, 2018. **34**(2): p. 247-252.
7. Gomez-Oliva, E., et al., *Psychophysiological response to the use of nuclear, biological and chemical equipment with military tasks*. Physiol Behav, 2019. **204**: p. 186-190.
8. Hamarsland, H., et al., *Depressed Physical Performance Outlasts Hormonal Disturbances after Military Training*. Med Sci Sports Exerc, 2018. **50**(10): p. 2076-2084.
9. Hormeno-Holgado, A.J. and V.J. Clemente-Suarez, *Psychophysiological Monitorization in a Special Operation Selection Course*. J Med Syst, 2019. **43**(3): p. 47.
10. Horn, G.P., et al., *Firefighter and fire instructor's physiological responses and safety in various training fire environments*. Safety Science, 2019. **116**: p. 287-294.
11. Hunt, A.P., I.B. Stewart, and D.C. Billing, *Indices of physiological strain for firefighters of the Australian Defence Forces*. J Occup Environ Hyg, 2019. **16**(11): p. 727-734.
12. Iizuka, N., S. Awano, and T. Ansai, *Salivary alpha-amylase activity and stress in Japan air self-defense force cargo pilots involved in Iraq reconstruction*. Am J Hum Biol, 2012. **24**(4): p. 468-72.
13. Izawa, S., A. Tsutsumi, and N. Ogawa, *Effort-reward imbalance, cortisol secretion, and inflammatory activity in police officers with 24-h work shifts*. Int Arch Occup Environ Health, 2016. **89**(7): p. 1147-54.
14. Kaikkonen, P., H. Lindholm, and S. Lusa, *Physiological Load and Psychological Stress During a 24-hour Work Shift Among Finnish Firefighters*. J Occup Environ Med, 2017. **59**(1): p. 41-46.
15. Kesler, R.M., et al., *Physiological response to firefighting activities of various work cycles using extended duration and prototype SCBA*. Ergonomics, 2018. **61**(3): p. 390-403.
16. Ledford, A.K., et al., *Psychological and Physiological Predictors of Resilience in Navy SEAL Training*. Behav Med, 2020. **46**(3-4): p. 290-301.

17. Lieberman, H.R., et al., *Cognitive function, stress hormones, heart rate and nutritional status during simulated captivity in military survival training*. *Physiol Behav*, 2016. **165**: p. 86-97.
18. Marcel-Millet, P., et al., *Physiological responses and parasympathetic reactivation in rescue interventions: The effect of the breathing apparatus*. *Scand J Med Sci Sports*, 2018. **28**(12): p. 2710-2722.
19. Marins, E.F., et al., *Effects of personal protective equipment on metabolism and performance during an occupational physical ability test for federal highway police officers*. *JSCR*, 2020. **34**: p. 1093-1102.
20. McClung, J.P., et al., *Effects of a 7-day military training exercise on inflammatory biomarkers, serum hepcidin, and iron status*. *Nutrition Journal* 2013. **12**.
21. Nindl, B.C., et al., *Physiological consequences of U.S. Army Ranger training*. *Med Sci Sports Exerc*, 2007. **39**(8): p. 1380-7.
22. Ojanen, T., et al., *Effect of Prolonged Military Field Training on Neuromuscular and Hormonal Responses and Shooting Performance in Warfighters*. *Mil Med*, 2018. **183**(11-12): p. e705-e712.
23. Ojanen, T., P. Jalanko, and H. Kyrolainen, *Physical fitness, hormonal, and immunological responses during prolonged military field training*. *Physiol Rep*, 2018. **6**(17): p. e13850.
24. Perroni, F., et al., *Effects of simulated firefighting on the responses of salivary cortisol, alpha-amylase and psychological variables*. *Ergonomics*, 2009. **52**(4): p. 484-91.
25. Petruzzello, S.J., et al., *Physiological, Perceptual and Psychological Responses of Career versus Volunteer Firefighters to Live-fire Training Drills*. *Stress Health*, 2016. **32**(4): p. 328-336.
26. Regehr, C., et al., *Acute stress and performance in police recruits*. *Stress and Health*, 2008. **24**(4): p. 295-303.
27. Sanchez-Molina, J., J.J. Robles-Perez, and V.J. Clemente-Suarez, *Assessment of Psychophysiological Response and Specific Fine Motor Skills in Combat Units*. *J Med Syst*, 2018. **42**(4): p. 67.
28. Sanchez-Molina, J., J.J. Robles-Perez, and V.J. Clemente-Suarez, *Psychophysiological and Specific Fine Motor Skill Modifications in a Checkpoint Action*. *J Med Syst*, 2019. **43**(4): p. 90.
29. Sanchez-Molina, J., J.J. Robles-Perez, and V.J. Clemente-Suarez, *Effect of Parachute Jump in the Psychophysiological Response of Soldiers in Urban Combat*. *J Med Syst*, 2017. **41**(6): p. 99.
30. Szivak, T.K., et al., *Adrenal Stress and Physical Performance During Military Survival Training*. *Aerosp Med Hum Perform*, 2018. **89**(2): p. 99-107.
31. Takeyama, H., et al., *Effects of shift schedules on fatigue and physiological functions among firefighters during night duty*. *Ergonomics*, 2005. **48**(1): p. 1-11.
32. Taylor, M.K., et al., *Stressful military training: endocrine reactivity, performance, and psychological impact*. *Aviat Space Environ Med*, 2007. **78**(12): p. 1143-9.
33. Tornero-Aguilera, J.F. and V.J. Clemente-Suarez, *Effect of experience, equipment and fire actions in psychophysiological response and memory of soldiers in actual underground operations*. *Int J Psychophysiol*, 2018. **128**: p. 40-46.
34. Tornero-Aguilera, J.F., J.J. Robles-Perez, and V.J. Clemente-Suarez, *Effect of Combat Stress in the Psychophysiological Response of Elite and Non-Elite Soldiers*. *J Med Syst*, 2017. **41**(6): p. 100.
35. Tornero-Aguilera, J.F., J.J. Robles-Perez, and V.J. Clemente-Suarez, *Use of Psychophysiological Portable Devices to Analyse Stress Response in Different Experienced Soldiers*. *J Med Syst*, 2018. **42**(4): p. 75.
36. Tyyska, J., et al., *Association with physical fitness, serum hormones and sleep during a 15-day military field training*. *J Sci Med Sport*, 2010. **13**(3): p. 356-9.
37. Vaara, J.P., et al., *Physical Fitness and Hormonal Profile During an 11-Week Paratroop Training Period*. *JSCR*, 2015. **29**.
38. Vartanian, O., et al., *Changes in mood, fatigue, sleep, cognitive performance and stress hormones among instructors conducting stressful military captivity survival training*. *Physiol Behav*, 2018. **194**: p. 137-143.
39. Vicente-Rodriguez, M., J.P. Fuentes-Garcia, and V.J. Clemente-Suarez, *Psychophysiological Stress Response in an Underwater Evacuation Training*. *Int J Environ Res Public Health*, 2020. **17**(7).
40. Wilkinson, A.F., et al., *Physiologic strain of SCBA confidence course training compared to circuit training and live-fire training*. *Appl Ergon*, 2020. **82**: p. 102966.
41. Young, P.M., et al., *Psychophysiological responses in experienced firefighters undertaking repeated self-contained breathing apparatus tasks*. *Ergonomics*, 2014. **57**(12): p. 1898-906.
42. Zare, S., et al., *Comparison of the effect of typical firefighting activities, live fire drills and rescue operations at height on firefighters' physiological responses and cognitive function*. *Ergonomics*, 2018. **61**(10): p. 1334-1344.
