# Supplementary material for: An Examination of Subjective and Objective Measures of Stress in Tactical Populations: A Scoping Review
Source: MDPI journal article supplement (doi:10.3390/healthcare11182515), 2023-09-11
Supplement: s1 [file s1]

Supplemental Table S1: Articles excluded from the review with reasons

| Reason for exclusion                                 | References     |
|------------------------------------------------------|----------------|
| Stress in cognitive tasks                            | [2, 6, 15, 17] |
| Conducted during extreme temperature (hot or cold)   | [9-13]         |
| Fitness measures used as predictors of stress        | [1,8]          |
| Anthropometric measures used as predictors of stress | [14]           |
| Examined long-term deployment                        | [7]            |
| Measures collected during graded exercise test       | [16]           |
| Outcome measures used to quantify stress             | [4]            |
| Stress as measure of infection                       | [5]            |
| Measures collected to predict selection              | [3]            |

References:

1. Abel, M. G., Mortara, A. J., & Pettitt, R. W. (2011). Evaluation of circuit-training intensity for firefighters. *Journal of Strength and Conditioning Research*, 25(10), 2895–2901.
2. Bhattacharyya, D., Pal, M., Chatterjee, T., & Majumdar, D. (2017). Effect of load carriage and natural terrain conditions on cognitive performance in Desert Environments. *Physiology & Behavior*, 179, 253–261.
3. Farina, E. K., Thompson, L. A., Knapik, J. J., Pasiakos, S. M., McClung, J. P., & Lieberman, H. R. (2019). Physical performance, demographic, psychological, and physiological predictors of success in the U.S. Army Special Forces Assessment and Selection Course. *Physiology & Behavior*, 210, 112647.
4. Gomes, P., Kaiseler, M., Lopes, B., Faria, S., Queiros, C., & Coimbra, M. (2013). Are standard heart rate variability measures associated with the self-perception of stress of firefighters in action? 2013 35th Annual International Conference of the IEEE Engineering in Medicine and Biology Society (EMBC).
5. Gomez-Merino, D., Drogou, C., Chennaoui, M., Tiollier, E., Mathieu, J., & Guezennec, C. Y. (2005). Effects of combined stress during intense training on cellular immunity, hormones and respiratory infections. *Neuroimmunomodulation*, 12(3), 164–172.
6. Hansen, A. L., Johnsen, B. H., & Thayer, J. F. (2009). Relationship between heart rate variability and cognitive function during threat of shock. *Anxiety, Stress & Coping*, 22(1), 77–89.
7. Hellewell, S. C., & Cernak, I. (2018). Measuring resilience to operational stress in Canadian Armed Forces personnel. *Journal of Traumatic Stress*, 31(1), 89-101.
8. Hormeño-Holgado, A. J., Nikolaidis, P. T., & Clemente-Suárez, V. J. (2019). Psychophysiological patterns related to success in a special operation selection course. *Frontiers in Physiology*, 10.
9. Larsen, B., Snow, R., & Aisbett, B. (2015). Effect of heat on firefighters' work performance and physiology. *Journal of Thermal Biology*, 53, 1–8.
10. Larsen, B., Snow, R., Vincent, G., Tran, J., Wolkow, A., & Aisbett, B. (2015). Multiple days of heat exposure on firefighters' work performance and physiology. *PLOS ONE*, 10(9).
11. Larsen, B., Snow, R., Williams-Bell, M., & Aisbett, B. (2015). Simulated firefighting task performance and physiology under very hot conditions. *Frontiers in Physiology*, 6.
12. Petruzzello, S. J., Gapin, J. I., Snook, E., & Smith, D. L. (2009). Perceptual and physiological heat strain: Examination in firefighters in laboratory- and field-based studies. *Ergonomics*, 52(6), 747–754.

13. Prell, R., Opatz, O., Merati, G., Gesche, B., Gunga, H.-C., & Maggioni, M. A. (2020). Heart rate variability, risk-taking behavior and resilience in firefighters during a simulated extinguish-fire task. *Frontiers in Physiology*, 11.
14. Sal, M. D., Barbieri, E., Garbati, P., Sisti, D., Rocchi, M. B., & Stocchi, V. (2009). Physiologic responses of firefighter recruits during a supervised live-fire work performance test. *Journal of Strength and Conditioning Research*, 23(8), 2396–2404.
15. Taverniers, J., Smeets, T., Van Ruysseveldt, J., Syroit, J., & von Grumbkow, J. (2011). The risk of being shot at: Stress, cortisol secretion, and their impact on memory and perceived learning during reality-based practice for armed officers. *International Journal of Stress Management*, 18(2), 113–132.
16. Von Heimburg, E., Sandsund, M., Rangul, T. P., & Reinertsen, R. E. (2017). Physiological and perceptual strain of firefighters during graded exercise to exhaustion at 40 and 10 °C. *International Journal of Occupational Safety and Ergonomics*, 25(3), 412–422.
17. Watt, P. W., Willmott, A. G. B., Maxwell, N. S., Smeeton, N. J., Watt, E., & Richardson, A. J. (2016). Physiological and psychological responses in fire instructors to heat exposures. *Journal of Thermal Biology*, 58, 106–114.
